# Supplementary material for: A Novel and Label-Free Chemiluminescence Detection of Zearalenone Based on a Truncated Aptamer Conjugated with a G-Quadruplex DNAzyme
Source: MDPI journal article supplement (doi:10.3390/bios13010118), 2023-01-09
Supplement: s1 [file s1]

Article

# A Novel and Label-Free Chemiluminescence Detection of Zearalenone Based on a Truncated Aptamer Conjugated with a G-Quadruplex DNzyme

Yue Guan <sup>1,2,†</sup>, Junning Ma <sup>3,4,†</sup>, Jing Neng <sup>1,2</sup>, Bolei Yang <sup>3,4</sup>, Yan Wang <sup>1,2,\*</sup> and Fuguo Xing <sup>3,4,\*</sup>

<sup>1</sup> College of Food Science and Technology, Zhejiang University of Technology, Hangzhou 310014, China

<sup>2</sup> Key Laboratory of Food Macromolecular Resources Processing Technology Research, Zhejiang University of Technology, China National Light Industry, Hangzhou 310014, China

<sup>3</sup> Key Laboratory of Agro-Products Quality and Safety Control in Storage and Transport Process, Ministry of Agriculture and Rural Affairs, Beijing 100193, China

<sup>4</sup> Institute of Food Science and Technology, Chinese Academy of Agricultural Sciences, Beijing 100193, China

\* Correspondence: wangyan062006@zjut.edu.cn (Y.W.); xingfuguo@caas.cn (F.X.)

† These authors contributed equally to this work.

**Table S1.** DNA oligos used in this study.

| Oligo names    | Sequences                                                                                      |
|----------------|------------------------------------------------------------------------------------------------|
| DNAzyme_ZEN    | <u>TGGGTAGGGCGGGTTGGG</u> <u>AAAGATT</u> <u>CATCTATCTATGGT</u><br><u>ACATTACTATCTGTAATGTGA</u> |
| DNAzyme_tZEN1  | <u>TGGGTAGGGCGGGTTGGG</u> <u>AAAGATT</u> <u>CATCTATCTATGGT</u>                                 |
| DNAzyme_tZEN2  | <u>TGGGTAGGGCGGGTTGGG</u> <u>AAAGATT</u> <u>CATCTATCTATGGT</u><br><u>ACATTACTAT</u>            |
| auxiliary DNA  | <u>AGTAATGTACCATAGATAGATGAATC</u> <u>TTTCCCAACCCGC</u><br><u>C</u>                             |
| DNAzyme_tZEN3  | <u>TGGGTAGGGCGGGTTGGG</u> <u>AAACATCTATCTATGGTACAT</u><br><u>TACTATCTGTAAT</u>                 |
| auxiliary DNA3 | <u>AGTAATGTACCATAGATAGATGT</u> <u>TTCCCAACCCGCC</u>                                            |

Note: red-colored letters represent DNAzyme or reverse-complement counterpart, while blue-colored letters denote ZEN aptamer or reverse-complement counterpart. Underlined letters indicate hybridized locations between DNAzyme-ZEN aptamer conjugate and the auxiliary DNA.

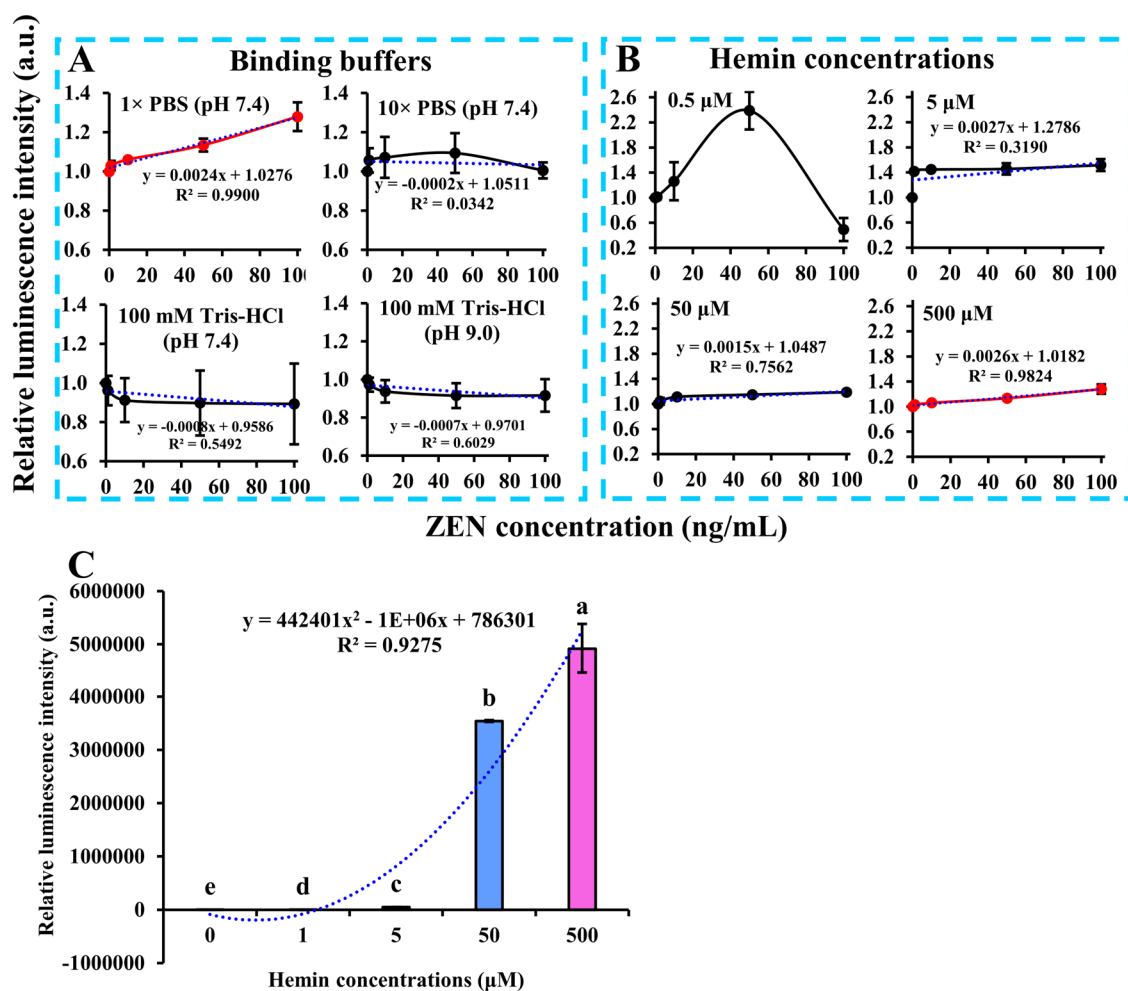

**Figure S1.** Feasibility exploration of label-free and chemiluminescence detection of ZEN based on a DNAzyme-aptamer conjugate by selection of various binding buffers (**A**) and hemin concentrations (**B** and **C**). Note: different letters denote significant difference ( $p < 0.05$ ) determined by one-way ANOVA followed by Fisher's least significant difference.

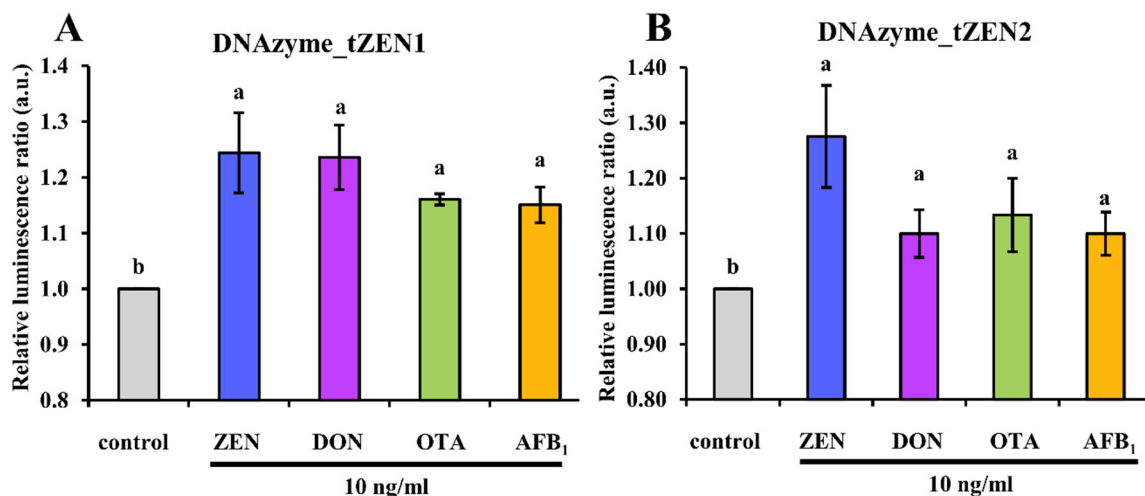

**Figure S2.** Detection specificity of the chemiluminescence aptasensor based on truncated aptamers: DNAzyme\_tZEN1 (**A**) and DNAzyme\_tZEN2 (**B**). Note: different letters denote significant difference ( $p < 0.05$ ) determined by one-way ANOVA followed by Fisher's least significant difference.

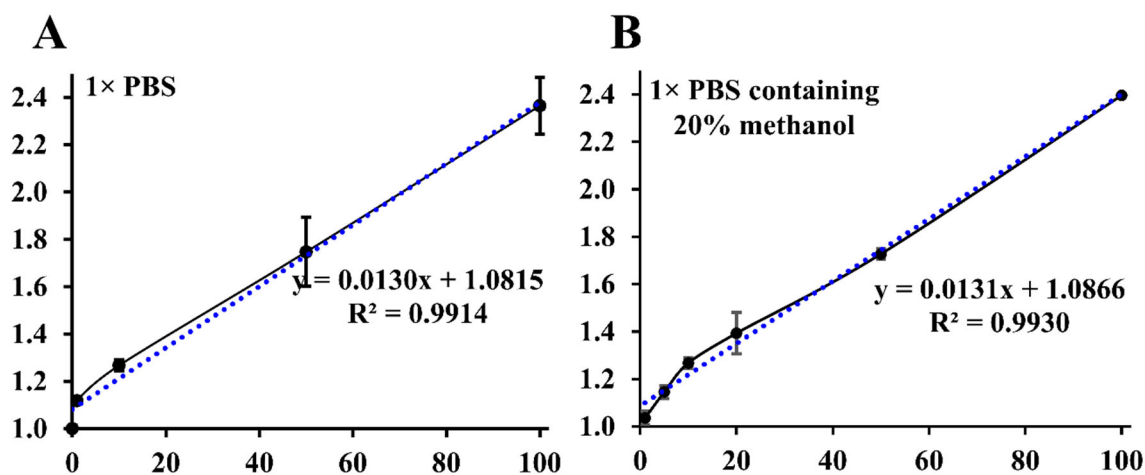

**Figure S3.** Effect of 20% methanol in 1× PBS binding buffer (**B**) on the performance of the chemiluminescence aptasensor as compared to 1× PBS control buffer (**A**).
